# Supplementary material for: Applicability of Different Estimated Glomerular Filtration Rate Equations in Chinese Healthy Population: A Cross-Sectional Study
Source: Research Square preprint supplement (doi:10.21203/rs.3.rs-601868/v1), 2021-06-11
Supplement: Supplementary file 1 [file 04d8742d200d609c5651cd44.xlsx]

## Sheet: Sheet1
			Table S4. Agreement of the three equations stratified by age in males.
			18-29years		FAS			k
					normal	mildly	moderate
			CKD-EPI	normal	2750	70	0	0.617
				mildly	0	59	0
				moderate	0	0	0
					FAS			k
					normal	mildly	moderate
			Xiangya	normal	2466	3	0	0.429
				mildly	284	126	0
				moderate	0	0	0
					CKD-EPI			k
					normal	mildly	moderate
			Xiangya	normal	2469	0	0	0.224
				mildly	351	59	0
				moderate	0	0	0
			30-39years		FAS			k
					normal	mildly	moderate
			CKD-EPI	normal	5019	22	0	0.827
				mildly	47	173	0
				moderate	0	0	0
					FAS			k
					normal	mildly	moderate
			Xiangya	normal	2878	0	0	0.089
				mildly	2188	195	0
				moderate	0	0	0
					CKD-EPI			k
					normal	mildly	moderate
			Xiangya	normal	2878	0	0	0.1
				mildly	2163	220	0
				moderate	0	0	0
			40-49years		FAS			k
					normal	mildly	moderate
			CKD-EPI	normal	3399	23	0	0.901
				mildly	44	342	0
				moderate	0	0	1
					FAS			k
					normal	mildly	moderate
			Xiangya	normal	896	0	0	0.063
				mildly	2547	365	0
				moderate	0	0	1
					CKD-EPI			k
					normal	mildly	moderate
			Xiangya	normal	896	0	0	0.067
				mildly	2526	386	0
				moderate	0	0	1
			50-59years		FAS			k
					normal	mildly	moderate
			CKD-EPI	normal	1524	315	0	0.685
				mildly	0	528	0
				moderate	0	1	2
					FAS			k
					normal	mildly	moderate
			Xiangya	normal	199	0	0	0.097
				mildly	1325	844	2
				moderate	0	0	0
					CKD-EPI			k
					normal	mildly	moderate
			Xiangya	normal	199	0	0	0.051
				mildly	1640	528	3
				moderate	0	0	0
			60-69years		FAS			k
					normal	mildly	moderate
			CKD-EPI	normal	286	248	0	0.494
				mildly	0	364	3
				moderate	0	0	5
					FAS			k
					normal	mildly	moderate
			Xiangya	normal	28	0	0	0.138
				mildly	258	612	6
				moderate	0	0	2
					CKD-EPI			k
					normal	mildly	moderate
			Xiangya	normal	28	0	0	0.05
				mildly	506	367	3
				moderate	0	0	2
			≥70years		FAS			k
					normal	mildly	moderate
			CKD-EPI	normal	26	23	0	0.513
				mildly	0	230	47
				moderate	0	0	18
					FAS			k
					normal	mildly	moderate
			Xiangya	normal	4	0	0	0.19
				mildly	22	253	58
				moderate	0	0	7
					CKD-EPI			k
					normal	mildly	moderate
			Xiangya	normal	4	0	0	0.264
				mildly	45	277	11
				moderate	0	0	7
