# Supplementary material for: Applicability of Different Estimated Glomerular Filtration Rate Equations in Chinese Healthy Population: A Cross-Sectional Study
Source: Research Square preprint supplement (doi:10.21203/rs.3.rs-601868/v1), 2021-06-11
Supplement: Supplementary file 2 [file 7f93626d8be3fc891e6cdccb.xlsx]

## Sheet: Sheet1
			Table S5. Agreement of the three equations stratified by age in females.
			18-29years		FAS			k
					normal	mildly	moderate
			CKD-EPI	normal	4282	41	0	0.536
				mildly	0	24	0
				moderate	0	0	0
					FAS			k
					normal	mildly	moderate
			Xiangya	normal	3943	0	0	0.258
				mildly	339	65	0
				moderate	0	0	0
					CKD-EPI			k
					normal	mildly	moderate
			Xiangya	normal	3943	0	0	0.103
				mildly	380	24	0
				moderate	0	0	0
			30-39years		FAS			k
					normal	mildly	moderate
			CKD-EPI	normal	7998	22	0	0.861
				mildly	2	75	0
				moderate	0	0	0
					FAS			k
					normal	mildly	moderate
			Xiangya	normal	5488	0	0	0.05
				mildly	2512	97	0
				moderate	0	0	0
					CKD-EPI			k
					normal	mildly	moderate
			Xiangya	normal	5488	0	0	0.04
				mildly	2532	77	0
				moderate	0	0	0
			40-49years		FAS			k
					normal	mildly	moderate
			CKD-EPI	normal	3905	40	0	0.842
				mildly	7	129	0
				moderate	0	0	1
					FAS			k
					normal	mildly	moderate
			Xiangya	normal	1110	0	0	0.033
				mildly	2802	169	0
				moderate	0	0	1
					CKD-EPI			k
					normal	mildly	moderate
			Xiangya	normal	1110	0	0	0.026
				mildly	2835	136	0
				moderate	0	0	1
			50-59years		FAS			k
					normal	mildly	moderate
			CKD-EPI	normal	1218	220	0	0.661
				mildly	0	238	0
				moderate	0	0	0
					FAS			k
					normal	mildly	moderate
			Xiangya	normal	118	0	0	0.055
				mildly	1100	458	0
				moderate	0	0	0
					CKD-EPI			k
					normal	mildly	moderate
			Xiangya	normal	118	0	0	0.025
				mildly	1320	238	0
				moderate	0	0	0
			60-69years		FAS			k
					normal	mildly	moderate
			CKD-EPI	normal	177	176	0	0.373
				mildly	0	145	8
				moderate	0	0	1
					FAS			k
					normal	mildly	moderate
			Xiangya	normal	3	0	0	0.031
				mildly	174	321	8
				moderate	0	0	1
					CKD-EPI			k
					normal	mildly	moderate
			Xiangya	normal	3	0	0	0.011
				mildly	350	153	0
				moderate	0	0	1
			≥70years		FAS			k
					normal	mildly	moderate
			CKD-EPI	normal	16	16	0	0.526
				mildly	0	88	14
				moderate	0	0	5
					FAS			k
					normal	mildly	moderate
			Xiangya	normal	0	0	0	0.139
				mildly	16	104	16
				moderate	0	0	3
					CKD-EPI			k
					normal	mildly	moderate
			Xiangya	normal	0	0	0	0.145
				mildly	32	102	2
				moderate	0	0	3
